# Supplementary material for: Indoor Air Quality including Respiratory Viruses
Source: MDPI journal article supplement (doi:10.3390/toxics9110274), 2021-10-21
Supplement: s1 [file s1]

## Article

# Supplementary Materials: Indoor Air Quality including Respiratory Viruses

Antonio López, Esther Fuentes, Vicent Yusà, F. Xavier López-Labrador, Marisa Camaró, Cristina Peris-Martinez, Martín Llácer, Susana Ortolá and Clara Coscollà

## Table of Contents

| Type        | Captions                                                                           | Page |
|-------------|------------------------------------------------------------------------------------|------|
| Table S-1   | Sensor specifications                                                              | S3   |
| Figure S-1  | Sampling methodologies: a) Cassette, b) AirScan with gelatin filter                | S4   |
| Figure S-2  | NO <sub>2</sub> concentrations (ppm) in the hall                                   | S5   |
| Figure S-3  | NO <sub>2</sub> concentrations (ppm) in the waiting room                           | S6   |
| Figure S-4  | NO <sub>2</sub> concentrations (ppm) in the doctor's consultation                  | S7   |
| Figure S-5  | CO <sub>2</sub> concentrations (ppm) in the hall                                   | S8   |
| Figure S-6  | CO <sub>2</sub> concentrations (ppm) in the waiting room                           | S9   |
| Figure S-7  | CO <sub>2</sub> concentrations (ppm) in the doctor's consultation                  | S10  |
| Figure S-8  | HCHO concentrations (mg/m <sup>3</sup> ) in the hall                               | S11  |
| Figure S-9  | HCHO concentrations (mg/m <sup>3</sup> ) in the waiting room                       | S12  |
| Figure S-10 | PM <sub>10</sub> concentrations (mg/m <sup>3</sup> ) in the hall                   | S13  |
| Figure S-11 | PM <sub>10</sub> concentrations (mg/m <sup>3</sup> ) in the waiting room           | S14  |
| Figure S-12 | PM <sub>10</sub> concentrations (mg/m <sup>3</sup> ) in the doctor's consultation  | S15  |
| Figure S-13 | PM <sub>2.5</sub> concentrations (mg/m <sup>3</sup> ) in the hall                  | S16  |
| Figure S-14 | PM <sub>2.5</sub> concentrations (mg/m <sup>3</sup> ) in the waiting room          | S17  |
| Figure S-15 | PM <sub>2.5</sub> concentrations (mg/m <sup>3</sup> ) in the doctor's consultation | S18  |
| Figure S-16 | VOCs concentrations (ppm) in the hall                                              | S19  |
| Figure S-17 | VOCs concentrations (ppm) in the waiting room                                      | S20  |
| Figure S-18 | Temperature (°C) in the hall                                                       | S21  |
| Figure S-19 | Temperature (°C) in the waiting room                                               | S22  |
| Figure S-20 | Temperature (°C) in the doctor's consultation                                      | S23  |
| Figure S-21 | Relative humidity (%) in the hall                                                  | S24  |
| Figure S-22 | Relative humidity (%) in the waiting room                                          | S25  |
| Figure S-23 | Relative humidity (%) in the doctor's consultation                                 | S26  |

**Table 1.** Sensor specifications.

| Gas             | Sensor type       | Work range (ppm)            | Detection limit (ppm)   | Resolution (ppm)        | Operating conditions |        |
|-----------------|-------------------|-----------------------------|-------------------------|-------------------------|----------------------|--------|
|                 |                   |                             |                         |                         | Temp (°C)            | RH (%) |
| CO              | GSE <sup>1</sup>  | 0-100                       | 0.2                     | 0.1                     | 0-40                 | 15-90  |
| CO <sub>2</sub> | NDIR <sup>2</sup> | 0-5000                      | 10                      | 1                       | 0-40                 | 0-95   |
| HCHO            | GSE <sup>1</sup>  | 0-10                        | 0.01                    | 0.01                    | 0-40                 | 15-90  |
| NO <sub>2</sub> | GSE <sup>1</sup>  | 0-1                         | 0.005                   | 0.001                   | 0-40                 | 15-90  |
| PM              | LPC <sup>4</sup>  | 0.001-1.0 mg/m <sup>3</sup> | 0.001 mg/m <sup>3</sup> | 0.001 mg/m <sup>3</sup> | 0-40                 | 0-90   |
| VOCs            | PID <sup>3</sup>  | 0-20                        | 0.1                     | 0.1                     | 0-40                 | 10-90  |

<sup>1</sup> GSE-Gas Sensitive Electrochemical, <sup>2</sup> NDIR-Non-dispersive infra-red, <sup>3</sup> pID- Photo Ionization Detector, <sup>4</sup> LPC- Laser particle counter

a)

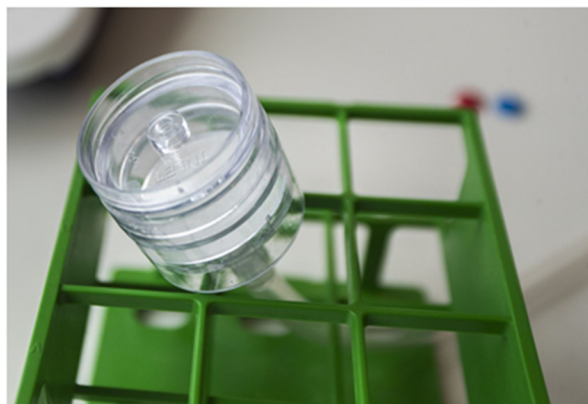

b)

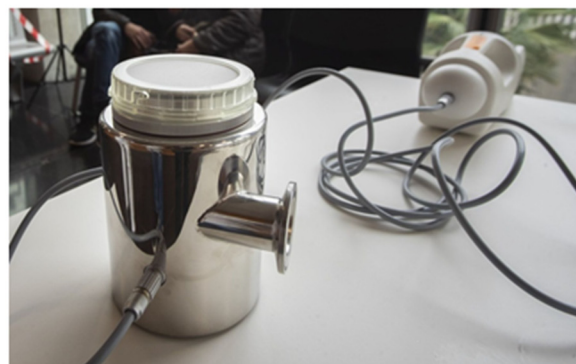

**Figure 1.** Sampling methodologies: a) Cassette b) AirScan with gelatin filter.

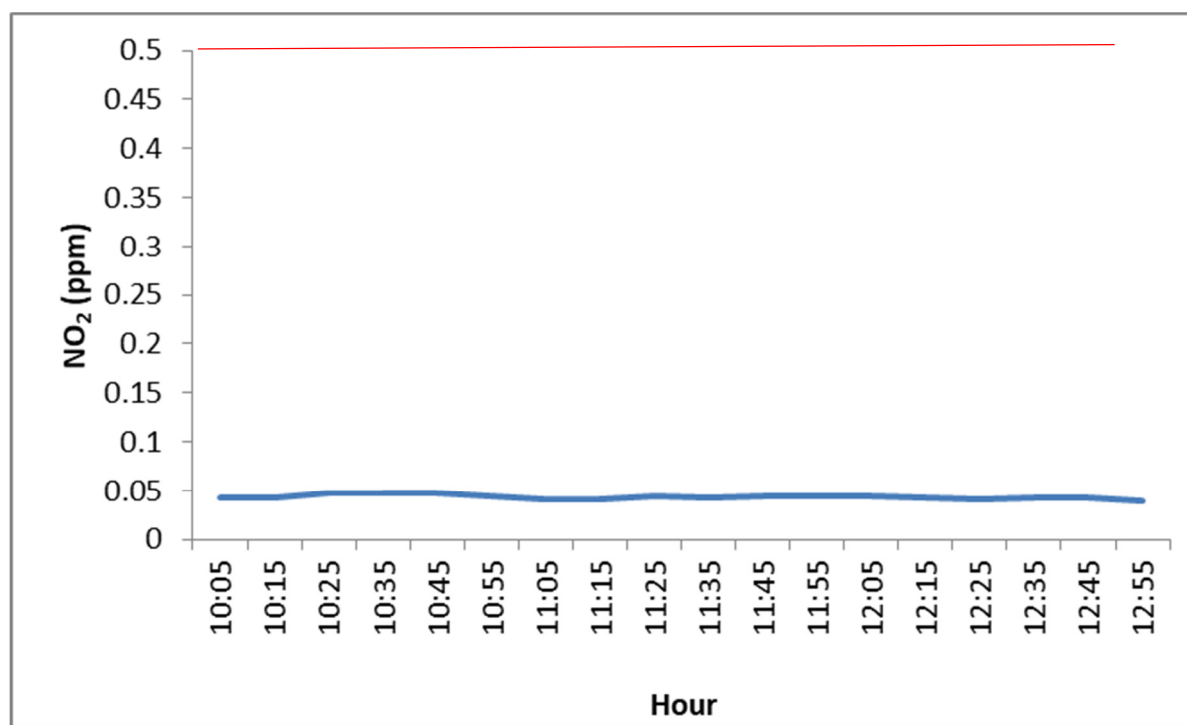

**Figure 2.** NO<sub>2</sub> concentrations (ppm) in the hall (Red line: Guideline value).

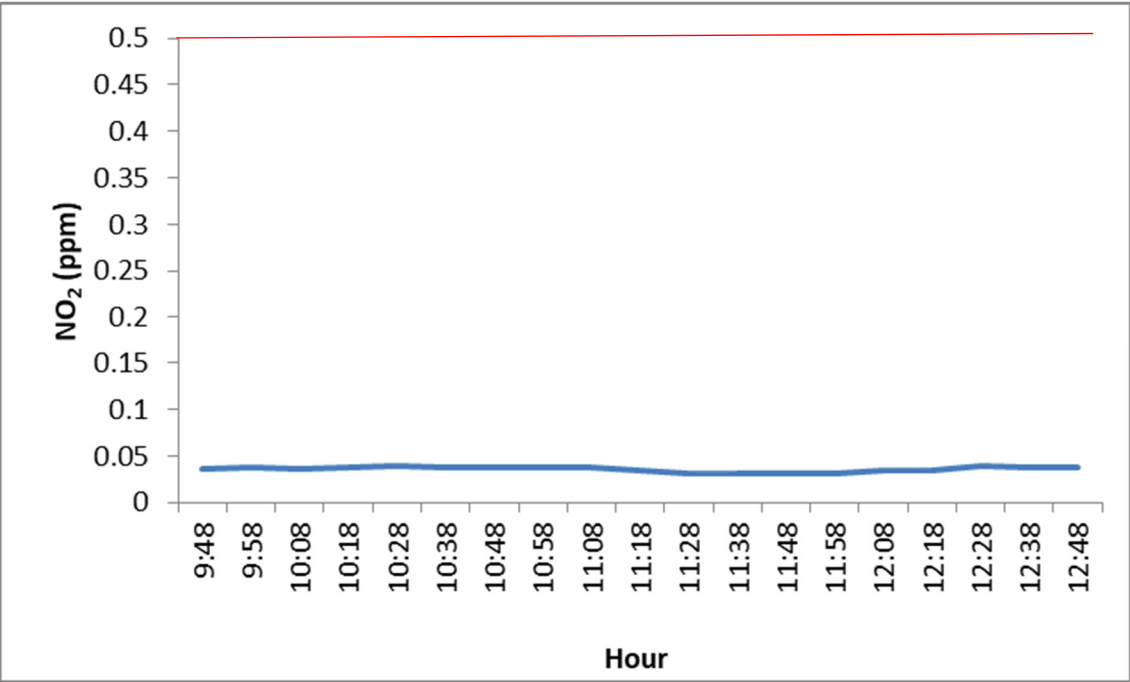

**Figure 3.** NO<sub>2</sub> concentrations (ppm) in the waiting room (Red line: Guideline value).

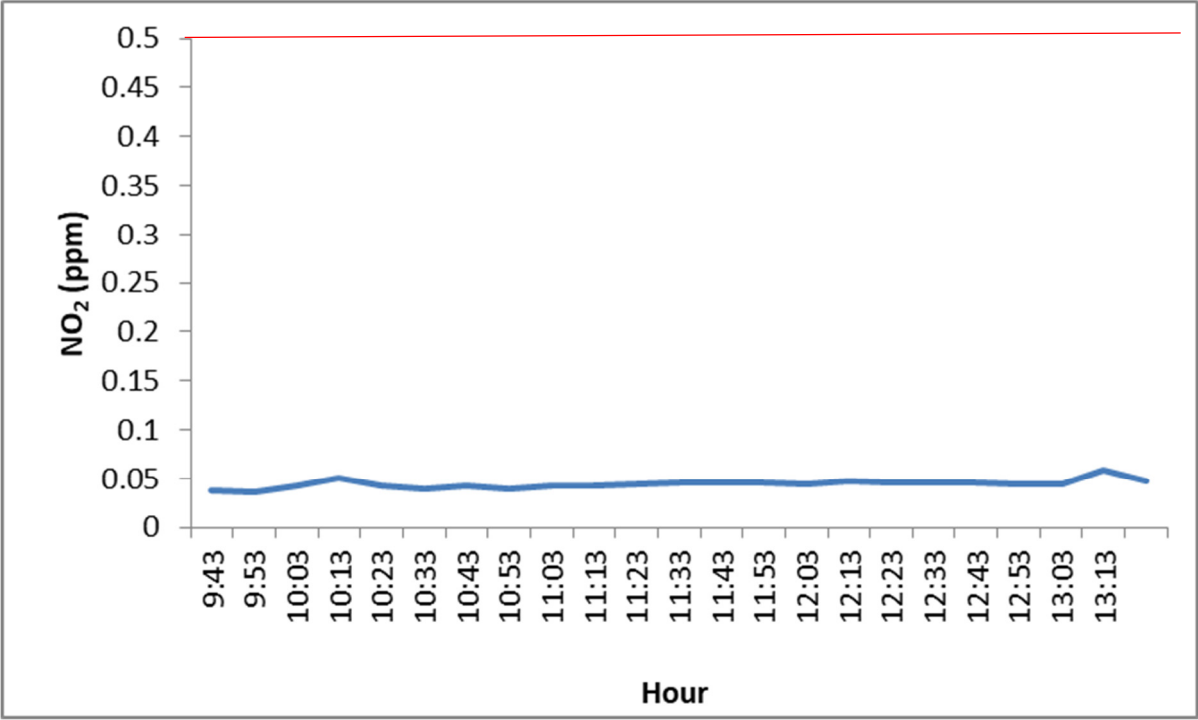

**Figure 4.** NO<sub>2</sub> concentrations (ppm) in the doctor’s consultation (Red line: Guideline value).

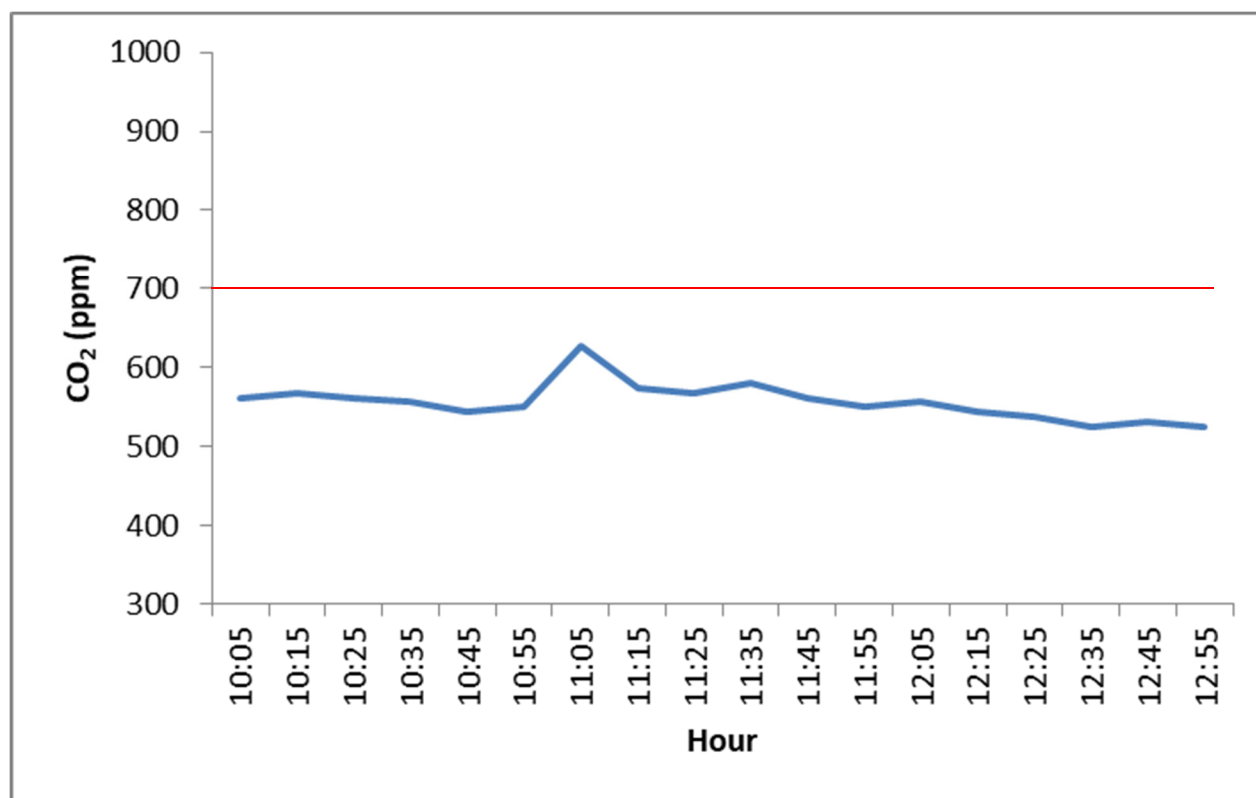

**Figure 5.** CO<sub>2</sub> concentrations (ppm) in the hall (Red line: Guideline value).

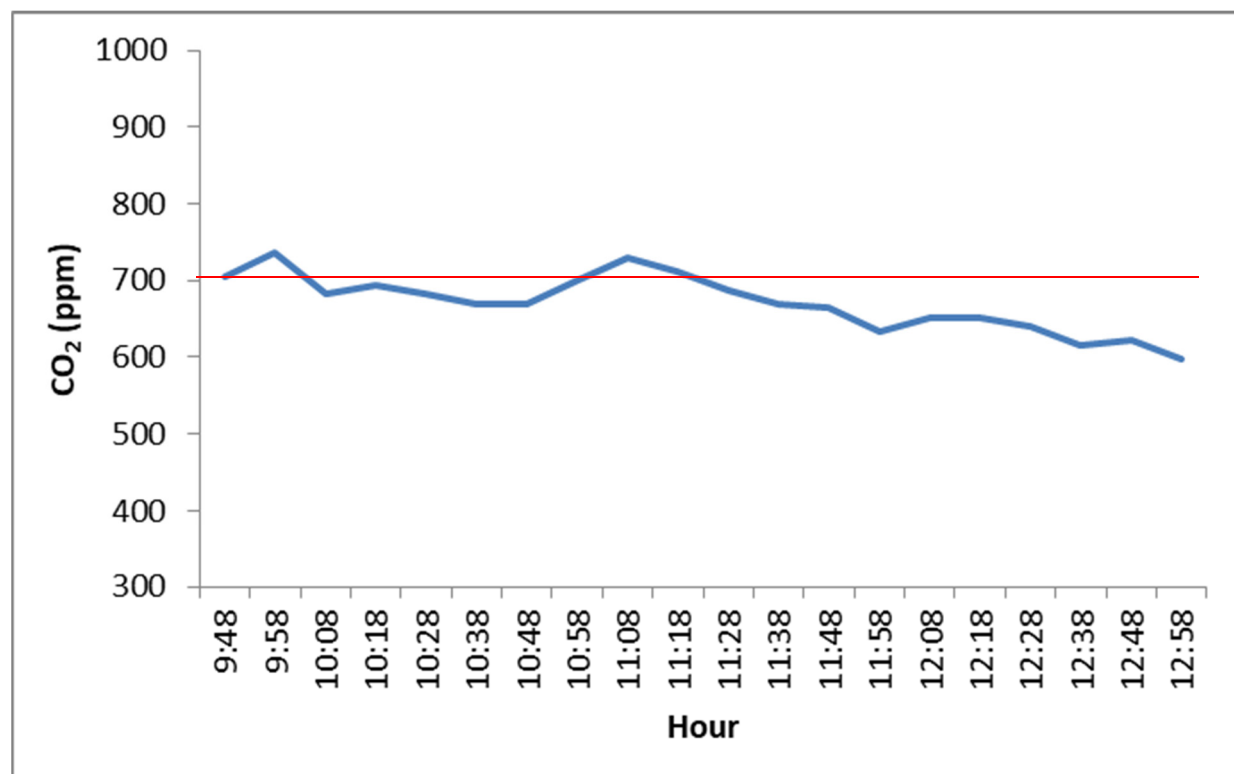

**Figure 6.** CO<sub>2</sub> concentrations (ppm) in the waiting room (Red line: Guideline value).



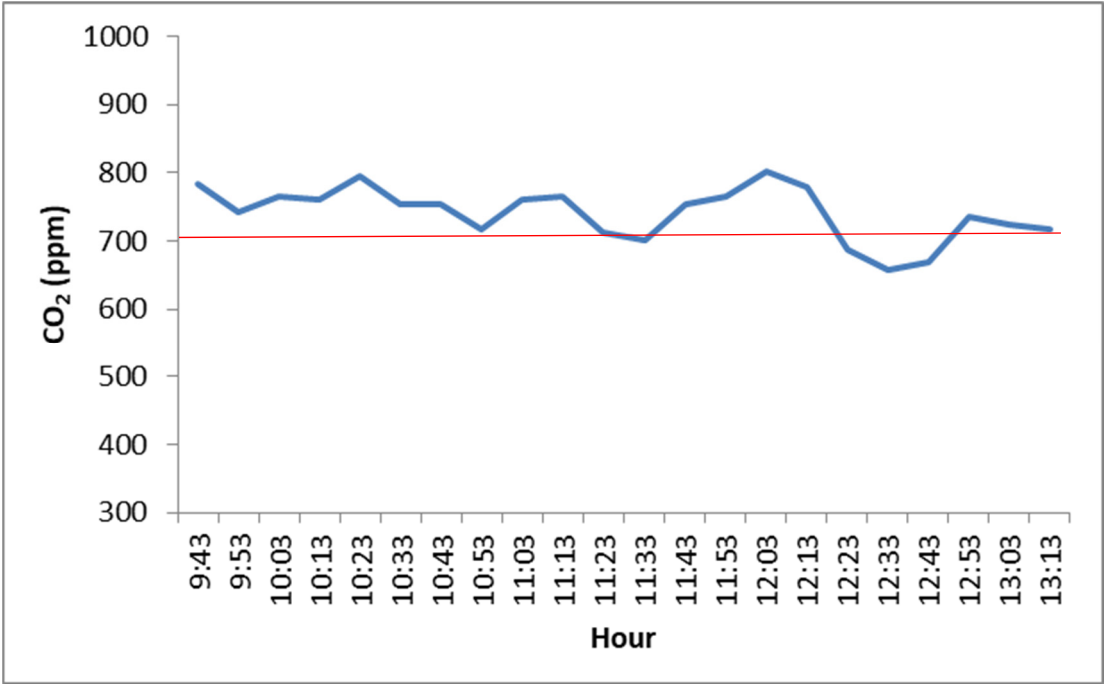

**Figure 7.** CO<sub>2</sub> concentrations (ppm) in the doctor’s consultation (Red line: Guideline value).

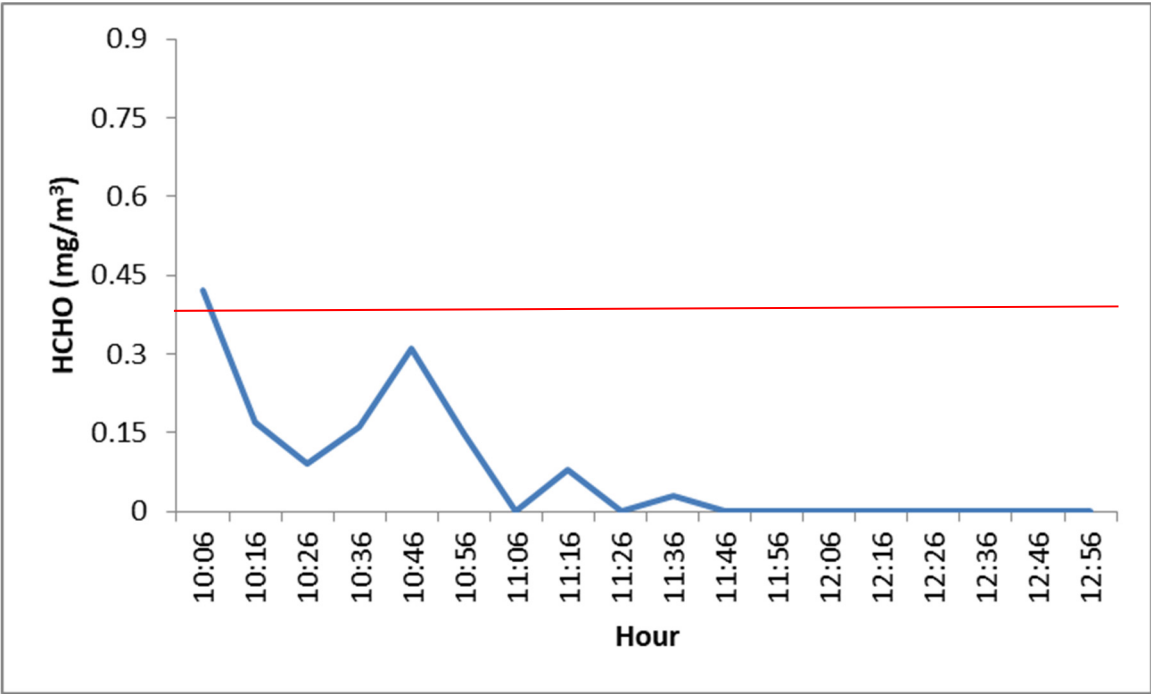

Figure S-8. HCHO concentrations (mg/m³) in the hall (Red line: Guideline value).

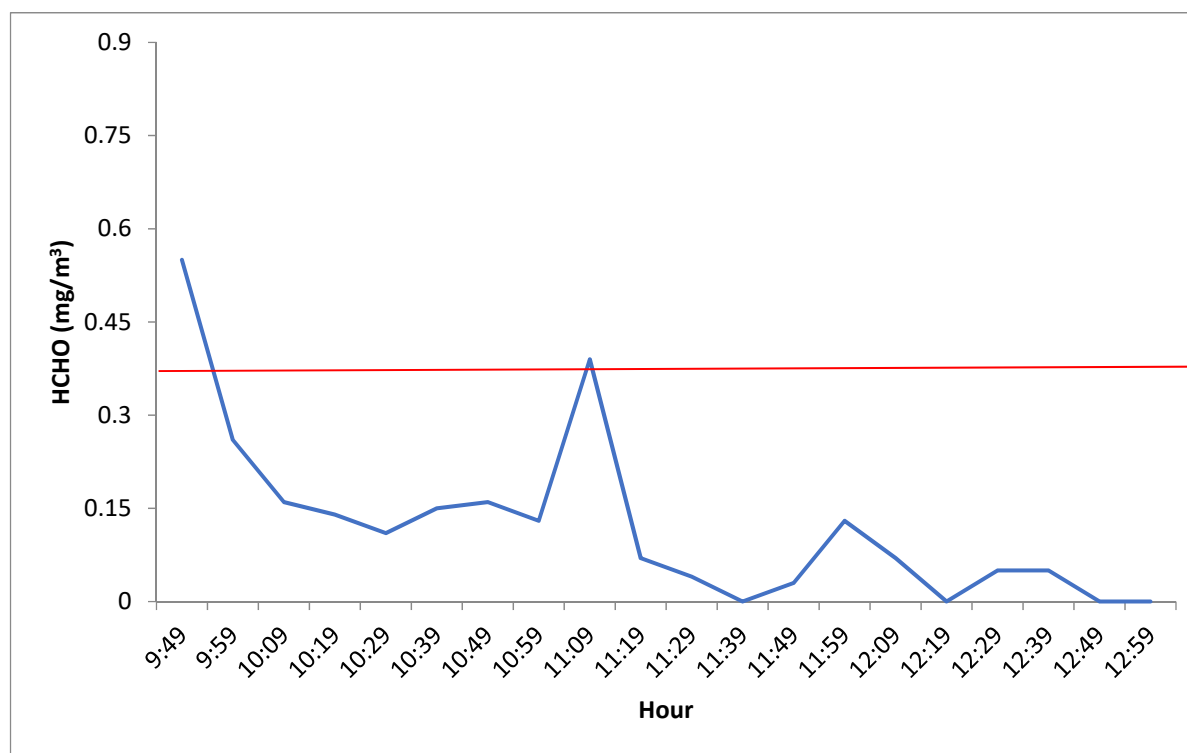

**Figure 9.** HCHO concentrations (mg/m³) in the waiting room (Red line: Guideline value).

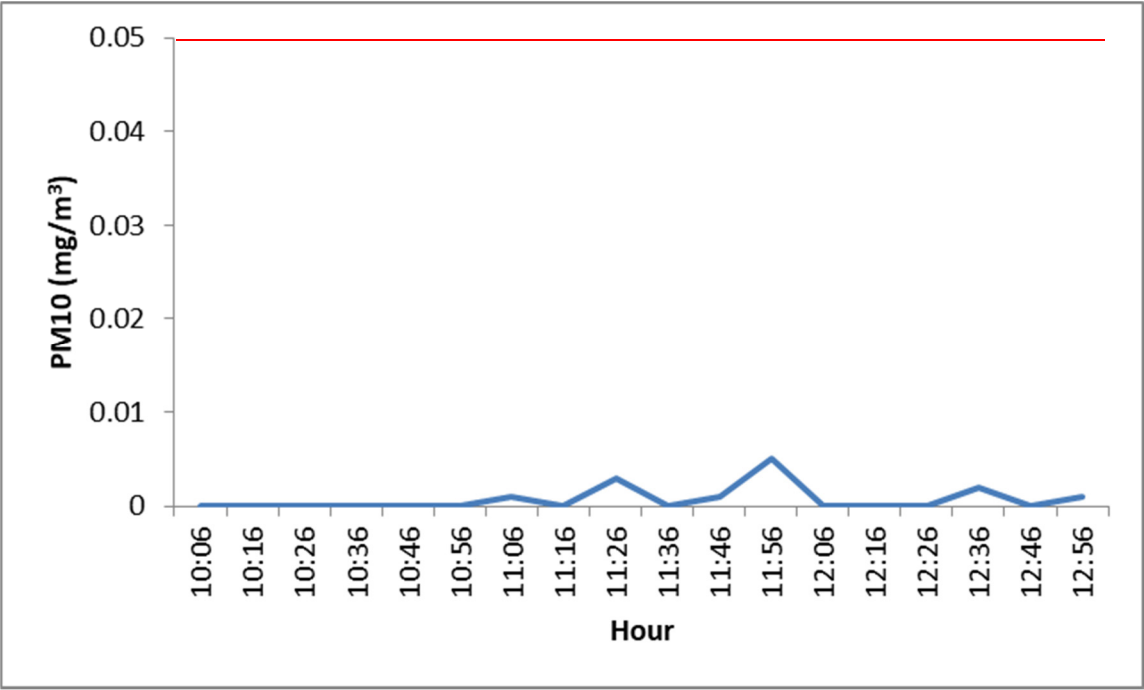

**Figure 10.** PM<sub>10</sub> concentrations (mg/m<sup>3</sup>) in the hall (Red line: Guideline value, WHO 2010).

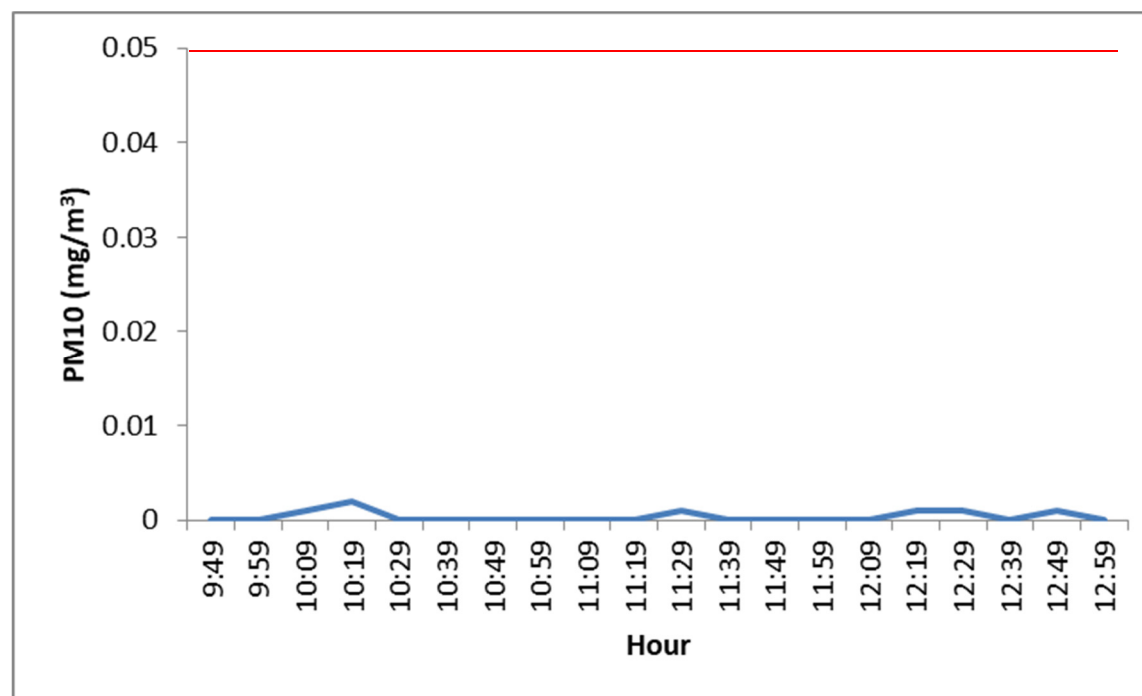

**Figure 11.** PM<sub>10</sub> concentrations (mg/m<sup>3</sup>) in the waiting room (Red line: Guideline value, WHO 2010).

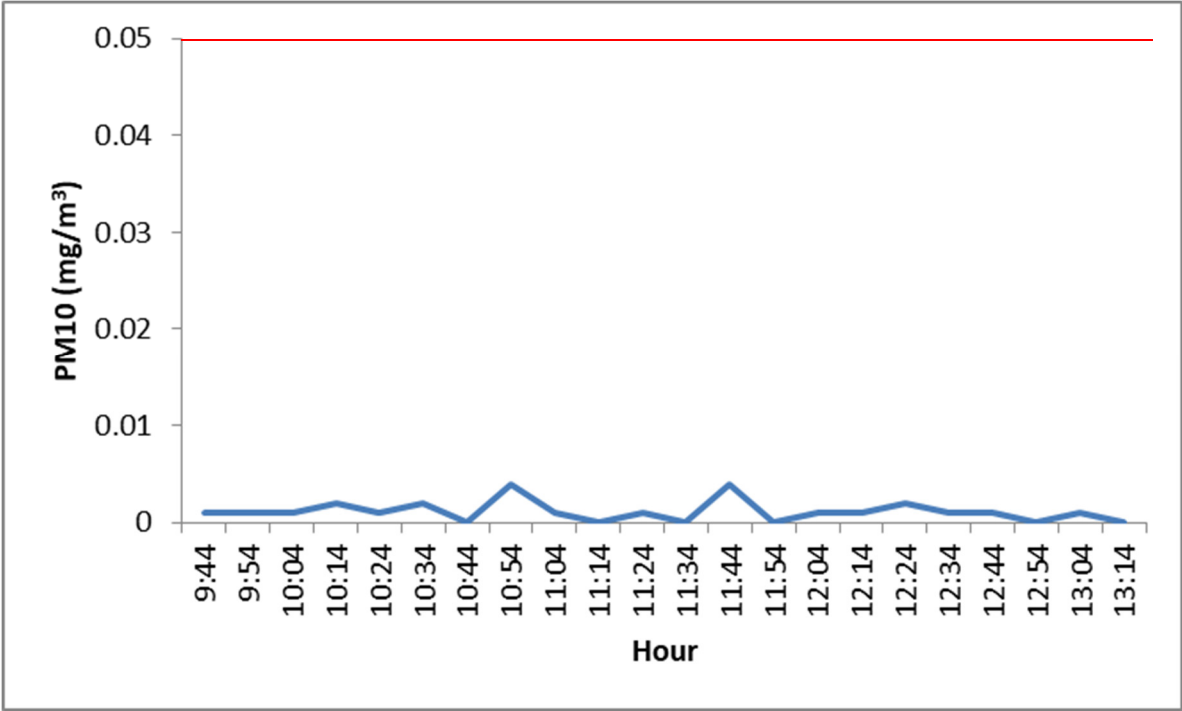

**Figure 12.** PM<sub>10</sub> concentrations (mg/m<sup>3</sup>) in the doctor's consultation (Red line: Guideline value, WHO 2010).

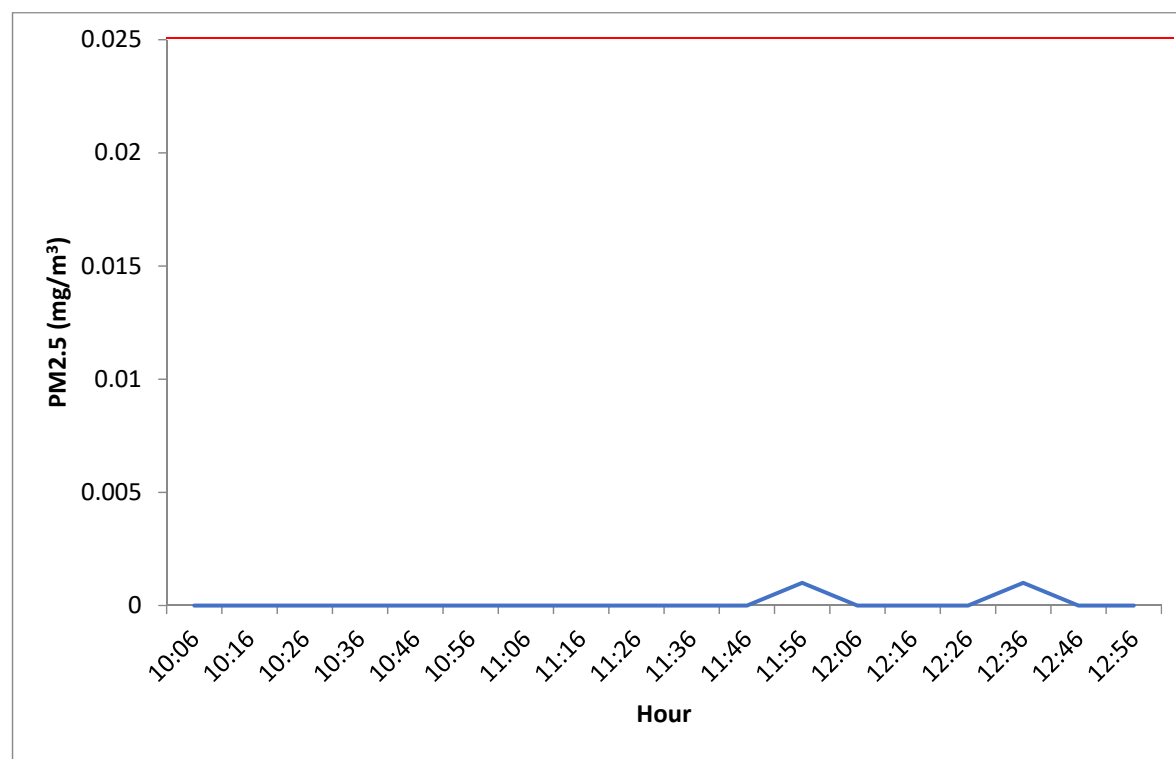

**Figure 13.** PM<sub>2.5</sub> concentrations (mg/m<sup>3</sup>) in the hall (Red line: Guideline value, WHO 2010).

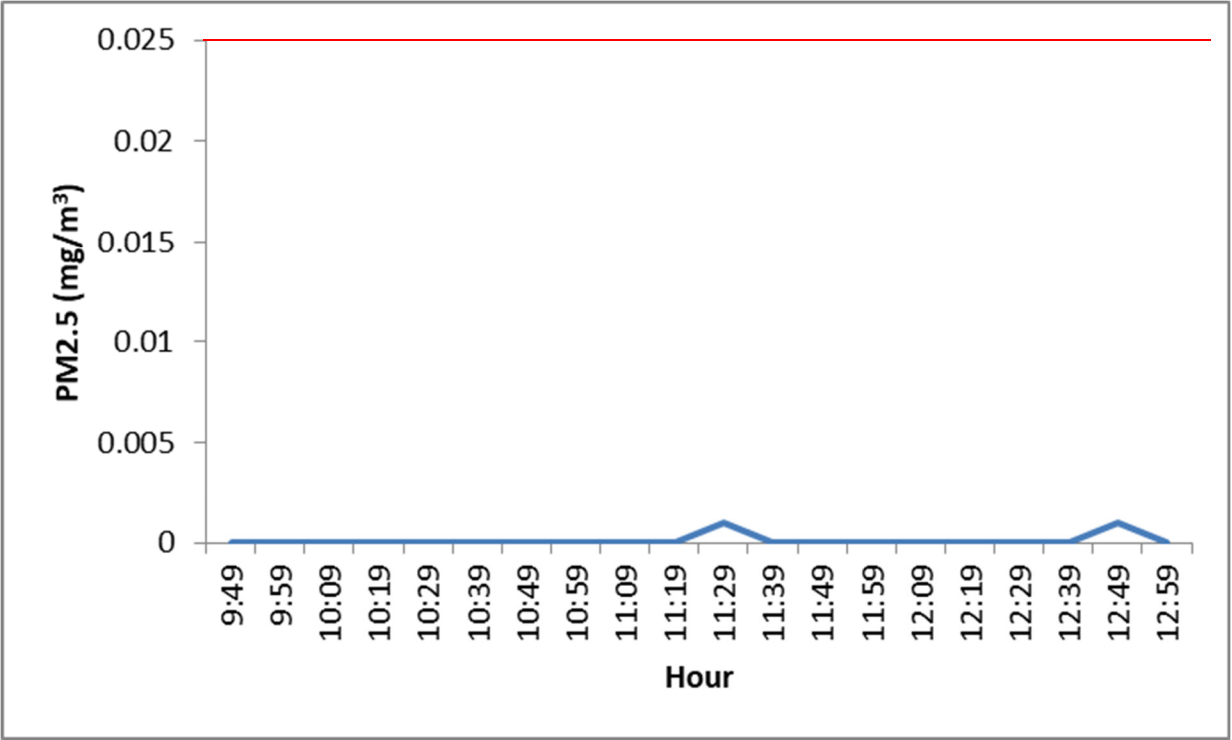

**Figure 14.** PM<sub>2.5</sub> concentrations (mg/m<sup>3</sup>) in the waiting room (Red line: Guideline value, WHO 2010).



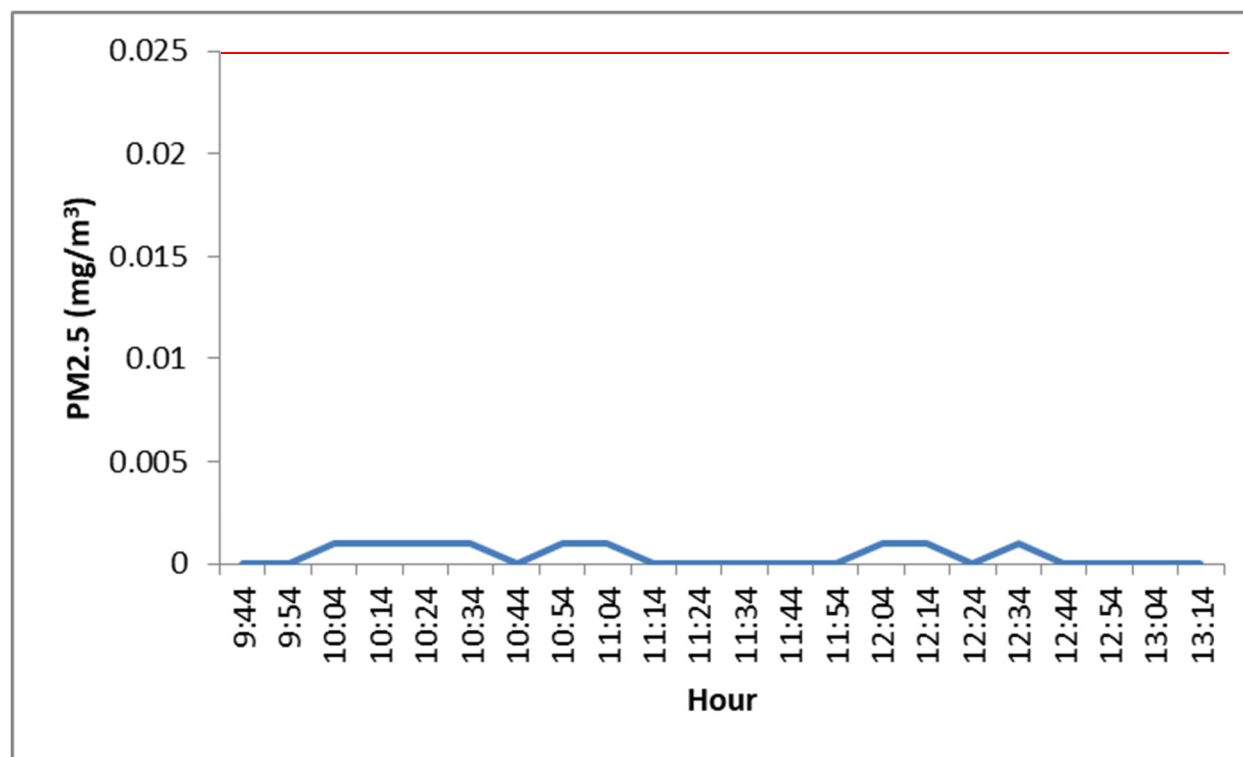

**Figure 15.** PM<sub>2.5</sub> concentrations (mg/m<sup>3</sup>) in the doctor's consultation (Red line: Guideline value, WHO 2010).

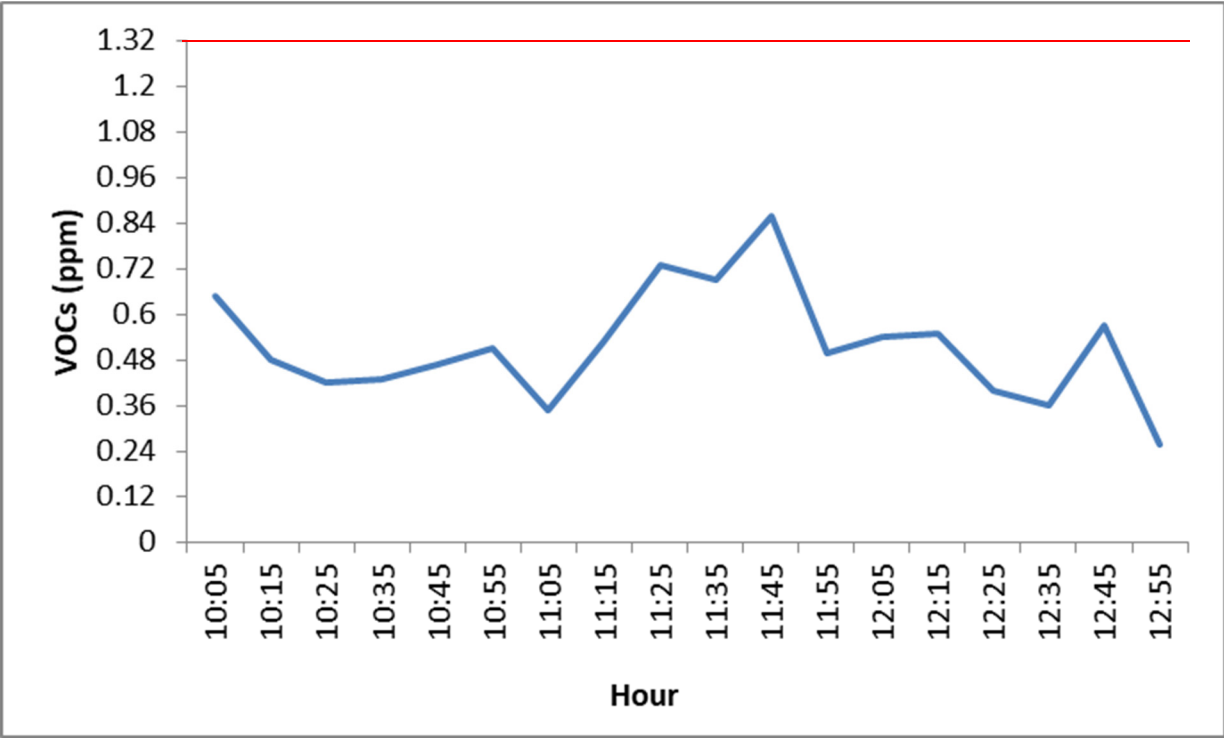

Figure 16. VOCs concentrations (ppm) in the hall (Red line: Guideline value).

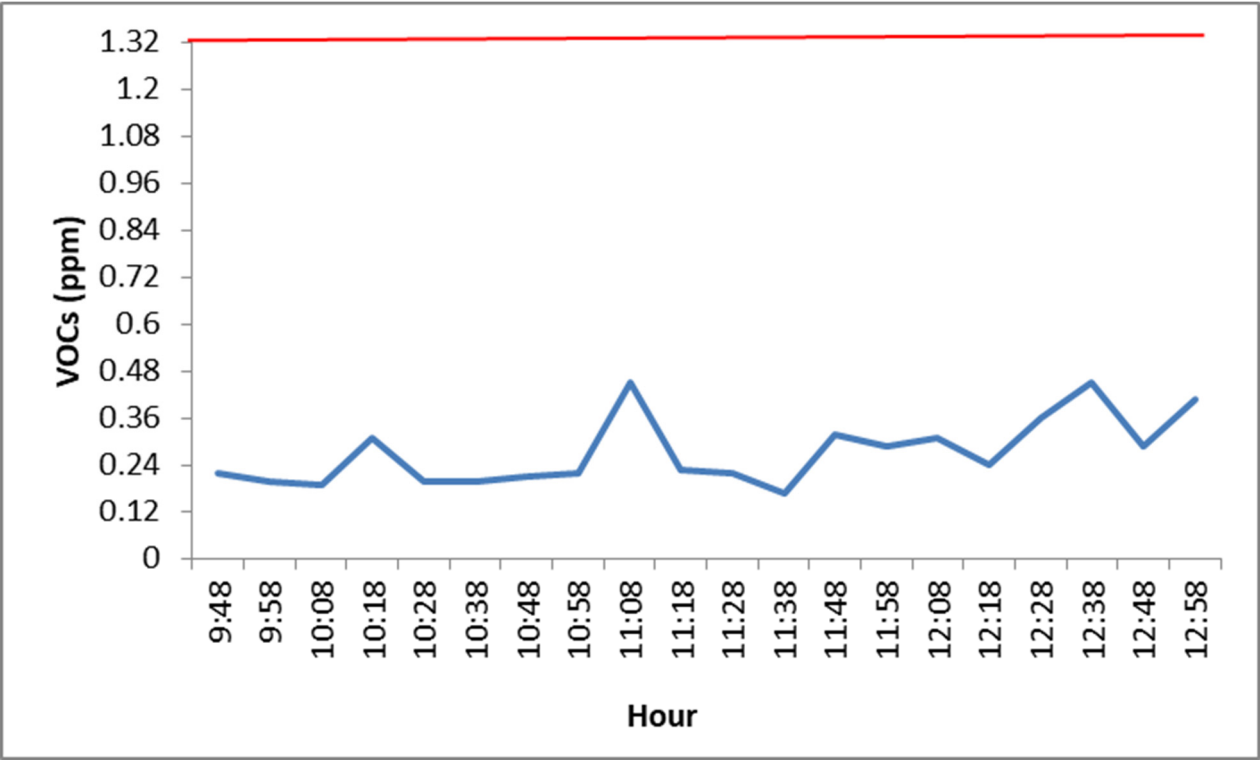

Figure 17. VOCs concentrations (ppm) in the waiting room (Red line: Guideline value).

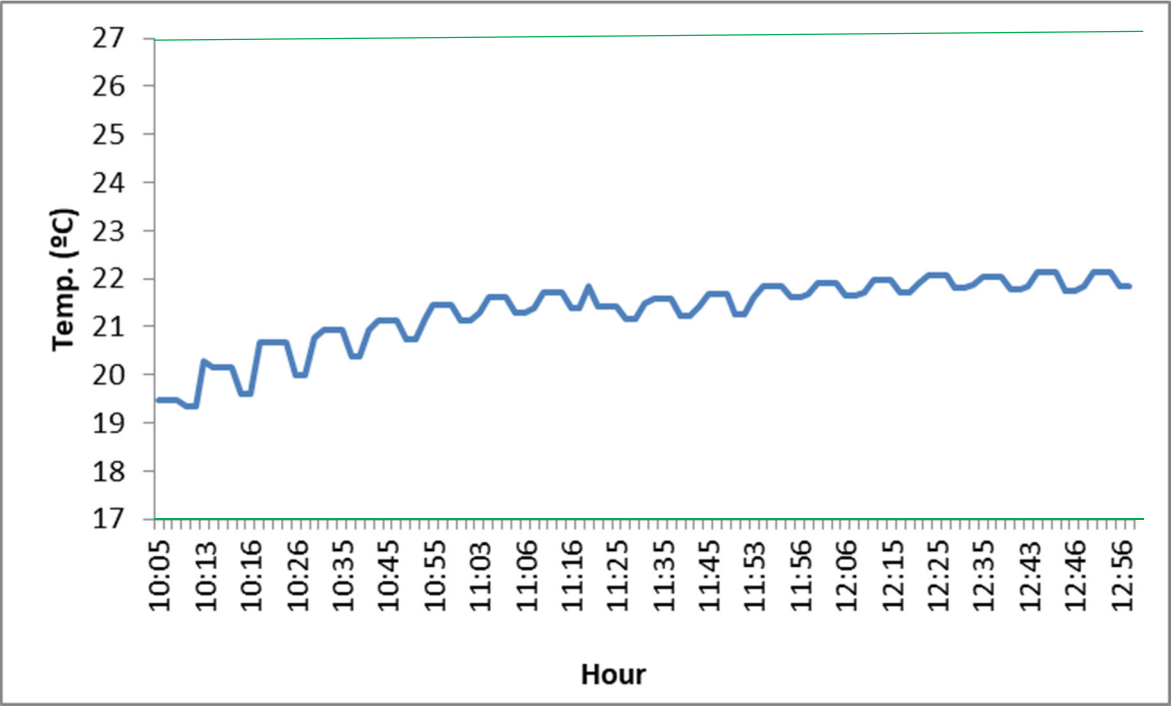

**Figure 18.** Temperature (°C) in the hall (Green line: Appropriate range).

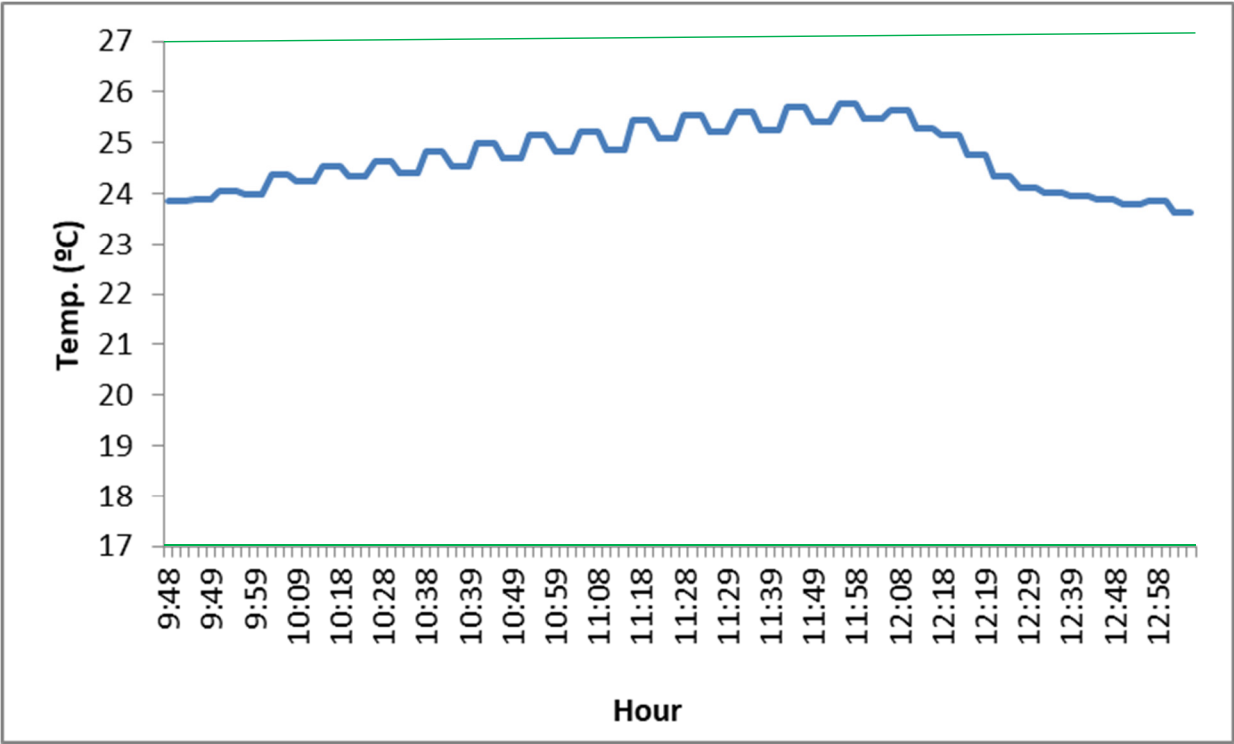

**Figure 19.** Temperature (°C) in the waiting room (Green line: Appropriate range).

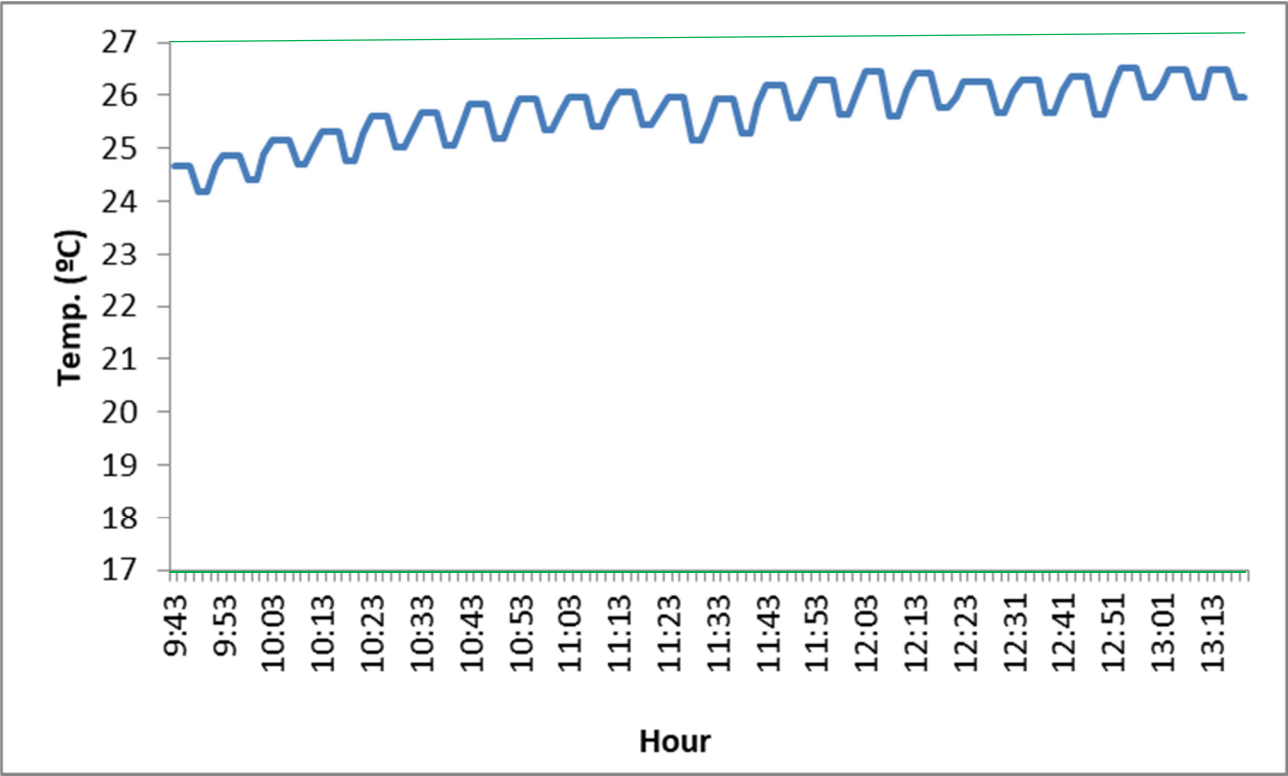

Figure 20. Temperature (°C) in the doctor’s consultation (Green line: Appropriate range).

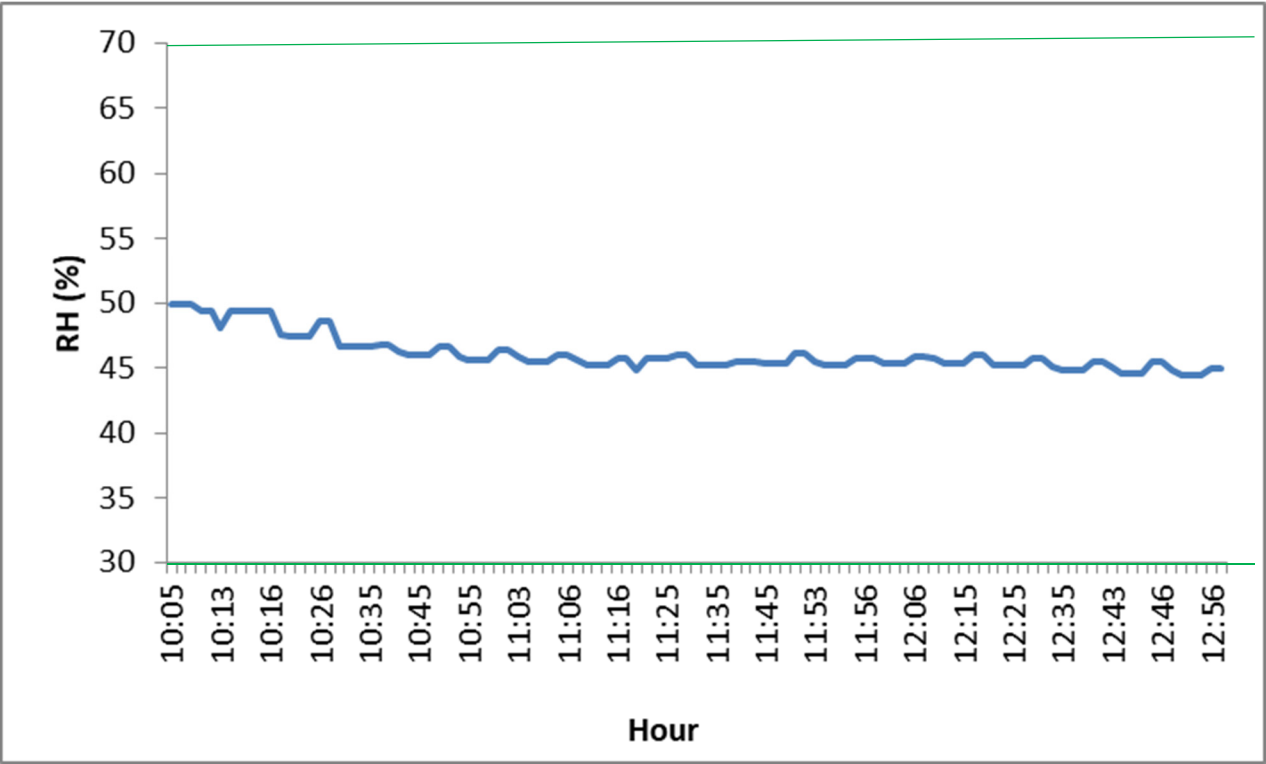

Figure 21. Relative humidity (%) in the hall (Green line: Appropriate range).

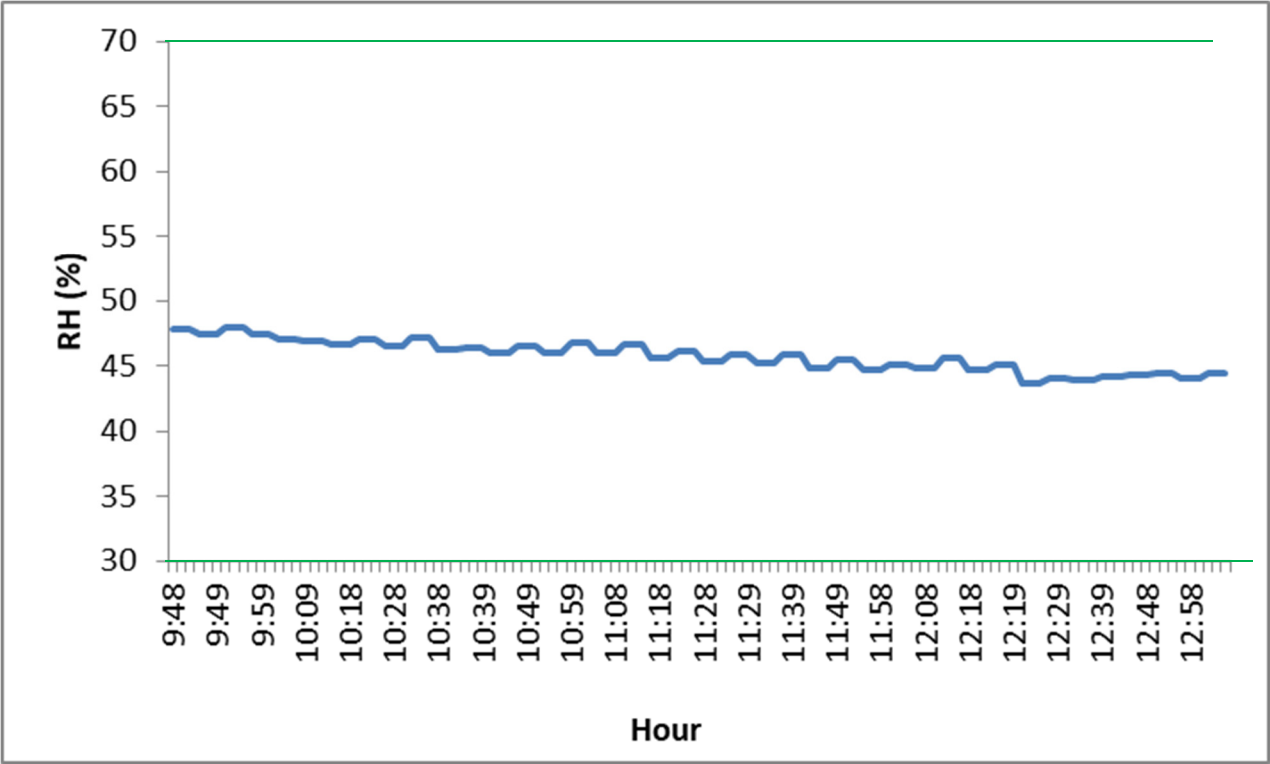

Figure 22. Relative humidity (%) in the waiting room (Green line: Appropriate range).



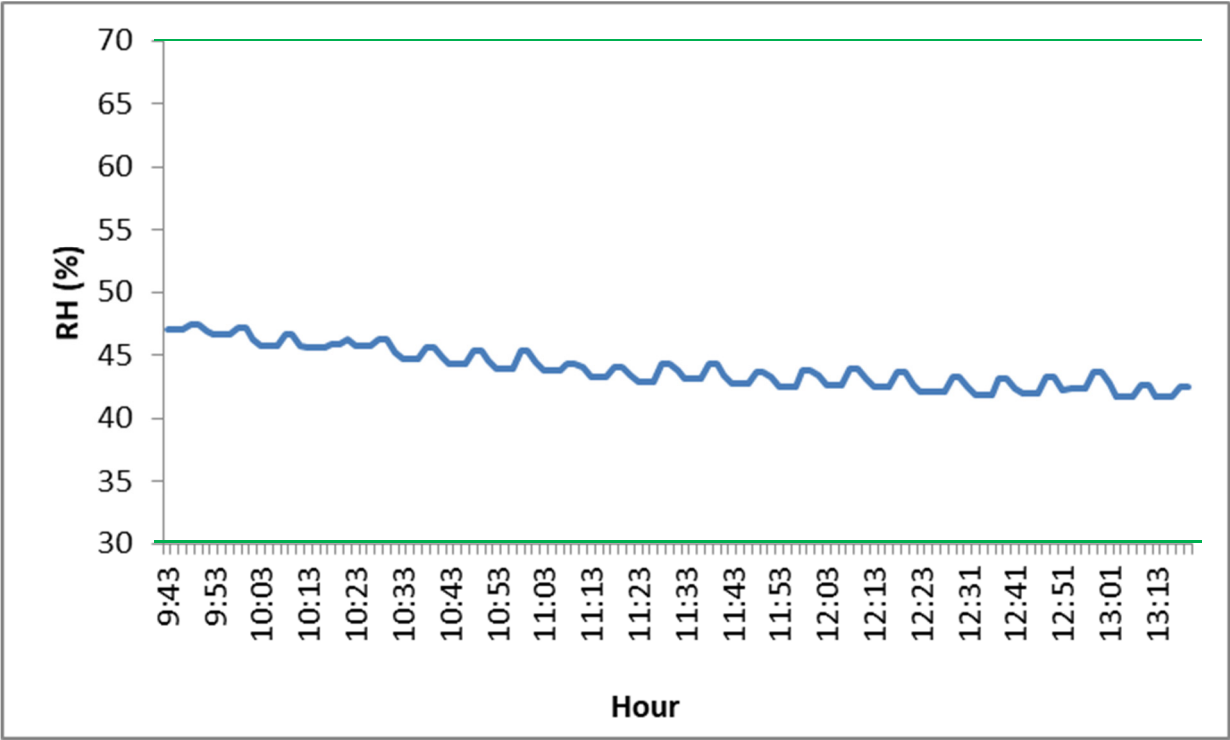

**Figure 23.** Relative humidity (%) in the doctor’s consultation (Green line: Appropriate range).
